# Supplementary material for: Cinnamaldehyde Mitigates Atherosclerosis Induced by High‐Fat Diet via Modulation of Hyperlipidemia, Oxidative Stress, and Inflammation
Source: Hindawi journal article supplement (doi:10.1155/2022/4464180), 2022-01-01
Supplement: f1 [file 4464180.f1.pdf]

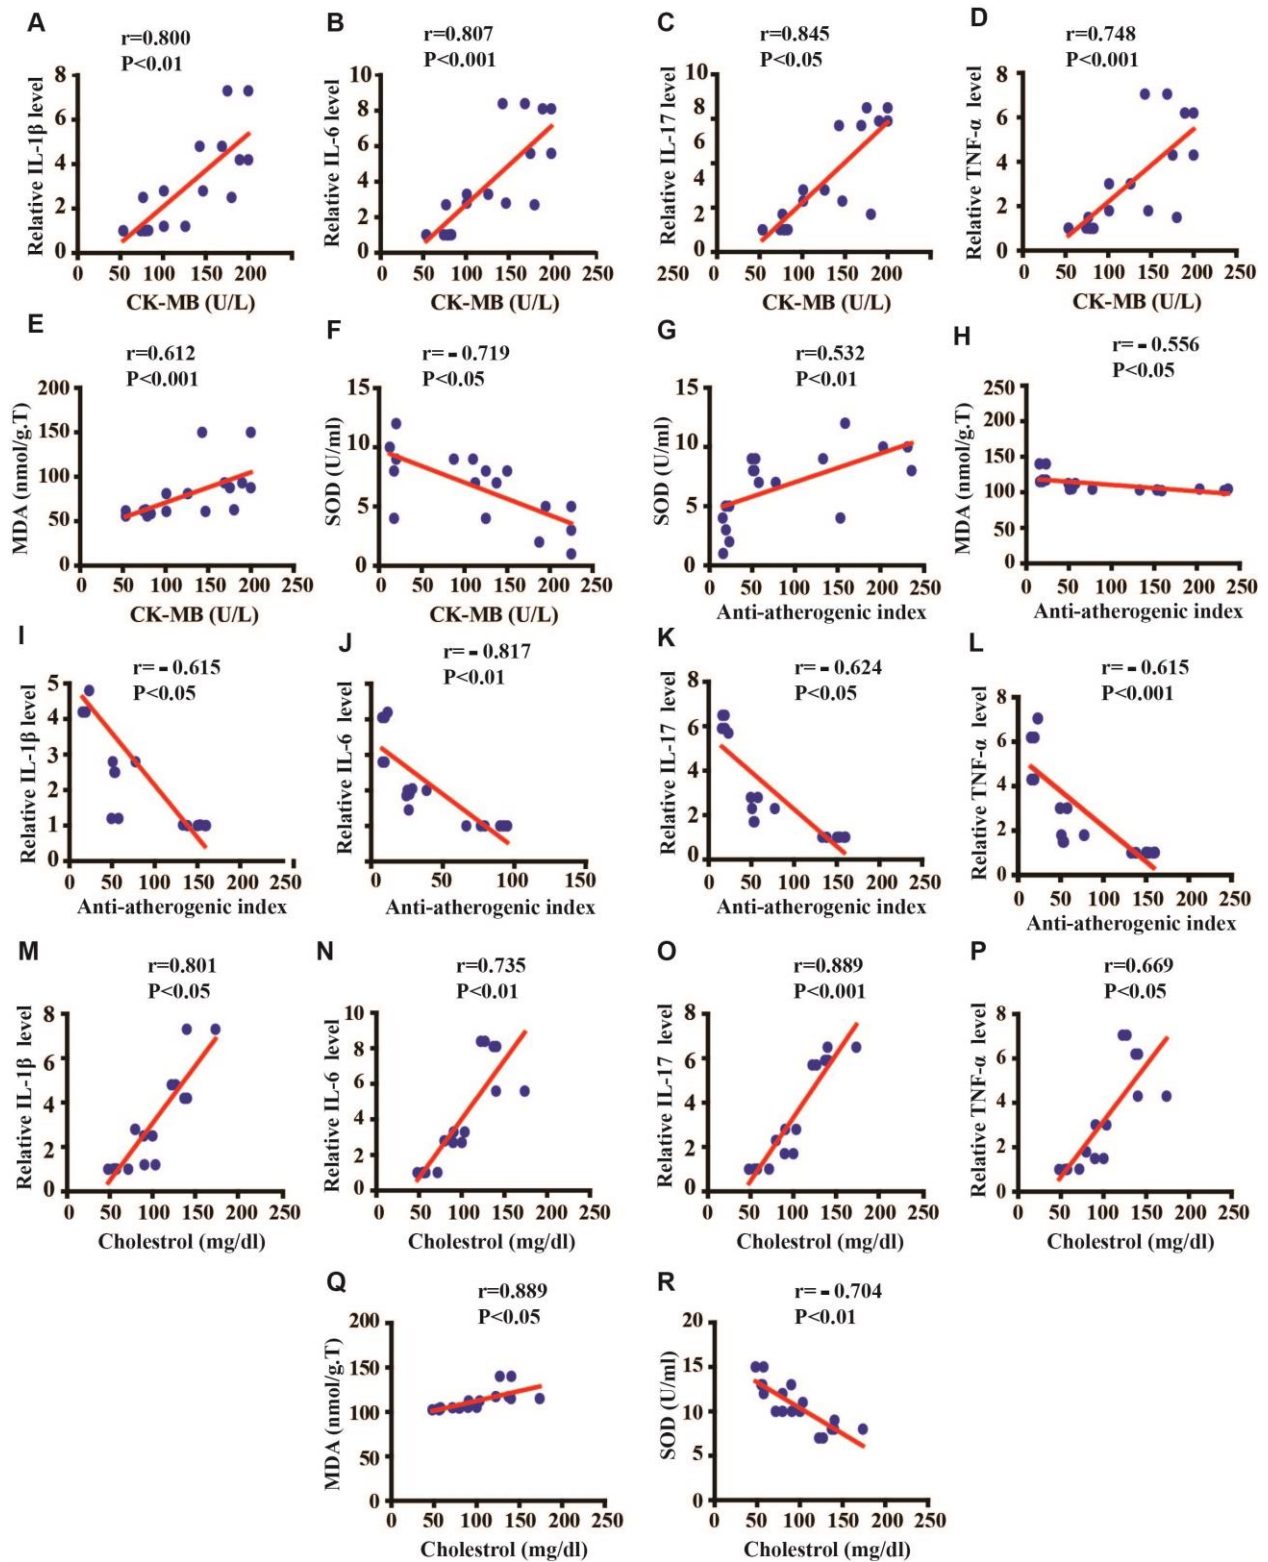

**Fig. 1:** Correlations between CK-MB, anti-atherogenic index and cholesterol with IL-1 $\beta$ , IL-6, IL-17, TNF- $\alpha$ , MDA and SOD among high-fat diet feeding rats
